# Supplementary material for: Evolutionary Spiking Neural Networks for Solving Supervised Classification Problems
Source: Hindawi journal article supplement (doi:10.1155/2019/4182639), 2019-03-28

## Appendix A. Examples of the best networks obtained

**Dataset:** Parkinson

**Configuration:**  $\beta_2$

**Accuracy of design:** 0.8762

**Accuracy of test:** 0.9183

**Corresponding word:**

0@+006.19,05.09(17@-905.03,04.46(o@+919.47,01.06{  
17@-865.36,01.08(16@-785.57,03.96(o@+241.11,06.99{  
4@+677.06,00.44(19@-935.31,02.36(o@+054.47,00.29{

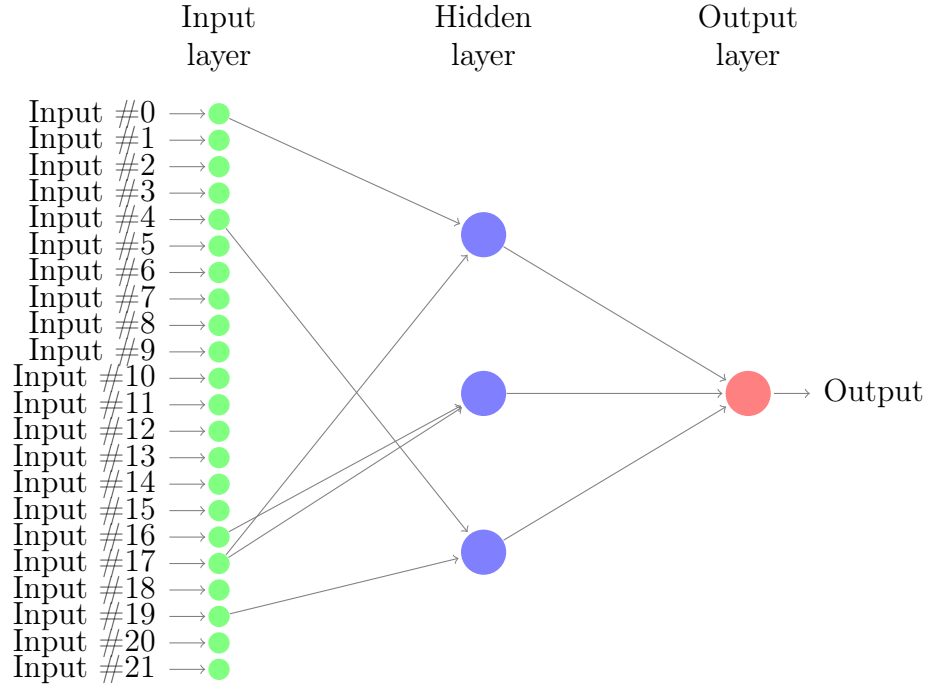

---

**Dataset:** Iris Plant

**Configuration:**  $\gamma_2$

**Accuracy of design:** 1.0000

**Accuracy of test:** 0.9600

**Corresponding word:**

2@+626.94,08.32(1@-829.47,07.16(0@-057.27,05.57(o@+428.91,00.63{

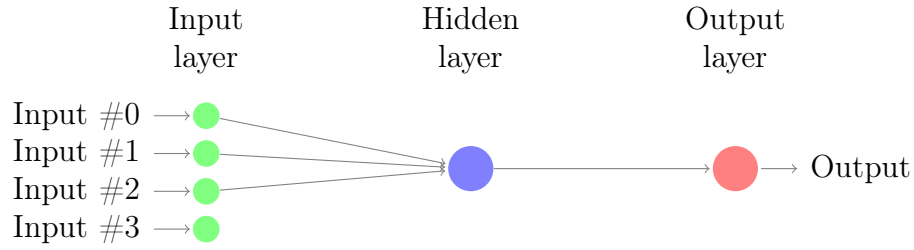


---

**Dataset:** Fertility  
**Configuration:**  $\gamma_2$   
**Accuracy of design:** 0.92  
**Accuracy of test:** 0.92  
**Corresponding word:**

5@+771.61,11.57(1@-322.51,11.54(o@+109.55,03.11{  
3@-133.67,03.16(1@+085.76,07.24(8@+279.02,07.03(4@+534.86,00.63(o@+199.01,02.23{  
7@-703.42,16.37(o@-735.66,10.81{  
4@-018.37,12.29(o@-995.42,13.94{  
0@-016.79,04.69(o@+822.55,09.71{

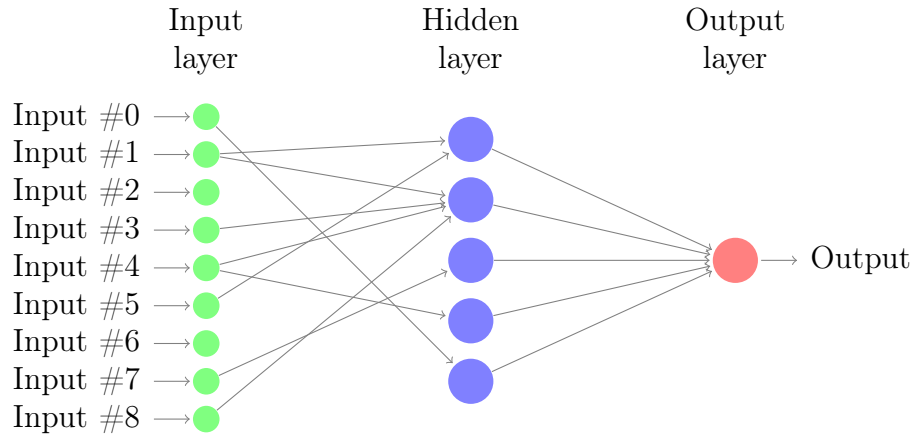


---

**Dataset:** Wine  
**Configuration:**  $\gamma_2$   
**Accuracy of design:** 1.0000  
**Accuracy of test:** 0.8333  
**Corresponding word:**

9@+378.67,07.72(2@+493.12,05.28(o@+029.66,03.64{  
 11@+445.42,15.37(10@+485.27,13.04(o@-245.21,13.84{  
 11@+389.39,10.02(o@-846.47,00.89{  
 6@-656.89,05.94(8@+033.62,01.37(0@-382.17,06.39(o@+636.03,01.53{  
 12@-006.61,04.22(2@+139.17,08.21(o@+423.19,03.45{

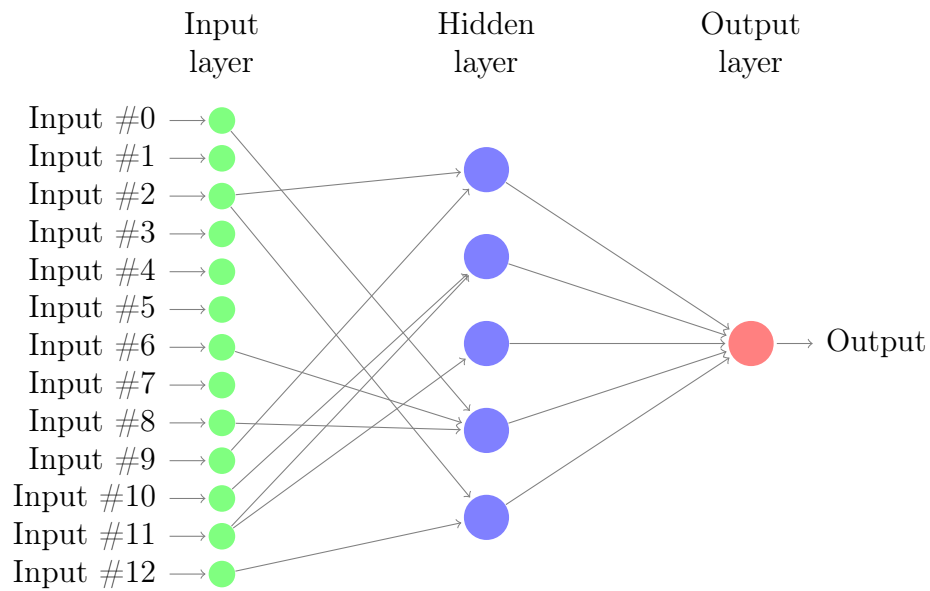

**Dataset:** Balance Scale

**Configuration:**  $\gamma_2$

**Accuracy of design:** 0.9071

**Accuracy of test:** 0.8498

**Corresponding word:**

2@+495.07,05.92(0@-508.06,05.63(3@+426.12,05.21(1@-616.39,06.95(o@+695.78,03.23{  
 0@+976.28,18.74(o@-807.75,08.41{  
 2@-944.25,17.81(o@+170.28,07.29{

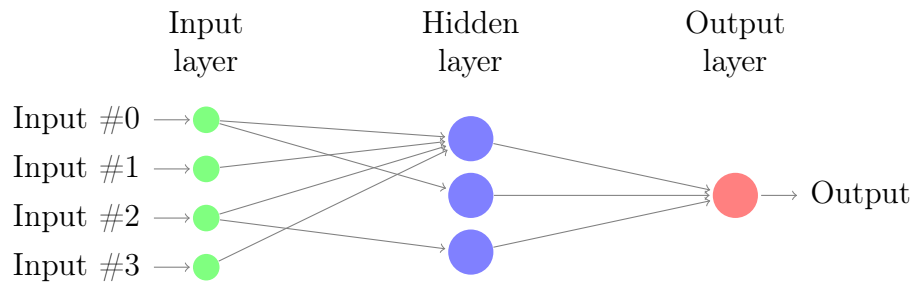

Supplement: f1 [file 4182639.f1.pdf]
